# Supplementary material for: Metabolic Profiling of Plasma from Benign and Malignant Pulmonary Nodules Patients Using Mass Spectrometry-Based Metabolomics
Source: Metabolites. 2013 Jul 4;3(3):539–51. doi: 10.3390/metabo3030539 (PMC3901282; doi:10.3390/metabo3030539)
Supplement: Supplementary File 1 — Supplementary (XLS, 24 KB) [file metabolites-03-00539-s001.xls]

## Sheet: Sheet1
Metabolites	CN				BSPNs				MSPNs				p (BSPNs vs MSPNs)	AUC
	Min	Max	Average	RSD	Min	Max	Average	RSD	Min	Max	Average	RSD
Alanine	105712	319449	202920	0.269277	51792	318168	137436	0.469047	50651	228548	103601	0.484788	0.0433516	0.70238
N-Succinyl-2,6-diaminopimelate	17684	85912	50801.3	0.525207	2556	55463	25814.3	0.492819	2556	44162	15402.5	0.906501	0.03608	0.7
Deoxycholic acid glycine conjugate	2628	56150	24880.8	0.633873	2628	48611	13584.1	1.06834	2628	15313	3374.18	0.911797	0.00426448	0.73214
N-Methylethanolamine phosphate	51374	97724	70546.4	0.192036	2556	60601	33936.5	0.547532	2556	85044	49413.4	0.395466	0.0182665	0.70437
Octanoylcarnitine	2556	192791	52433.6	0.773841	2556	231319	118751	0.649496	2556	123923	54552.7	0.633426	0.0182665	0.7381
LPC(16:0)	1035894	5494619	2.05437e+06	0.603441	461484	3190056	1.51999e+06	0.419753	631570	2574634	1188301	0.39959	0.0246475	0.72222
LPC(18:1)	176837	532147	311089	0.346293	69396	502638	303865	0.404695	122119	530169	232211	0.416142	0.0395834	0.71032
LPC(18:2)	334482	1209776	806519	0.296103	204638	827877	560452	0.330096	180170	985745	421224	0.418448	0.0246475	0.74603
LPC(22:6)	208822	594223	338773	0.291062	63084	753022	322629	0.538553	80554	307295	205194	0.358846	0.0182665	0.78175
LPE(20:2)	43151	105800	67081.9	0.210334	18730	63731	49362.3	0.267516	18507	68275	38849.5	0.300729	0.0223336	0.76786
PC(34:1)	76033	604667	201247	0.637455	2556	324215	97314.1	1.01302	2556	389349	164590	0.553031	0.0182665	0.75
PS(35:1)	2628	297639	158718	0.623623	2628	173075	91364.8	0.557067	2628	239183	57432.1	1.16712	0.0201995	0.71032
PS(41:5)	1205570	2207041	1.93074e+06	0.141284	721331	3130978	1.88247e+06	0.347691	728029	2694464	1528073	0.376492	0.0433516	0.69841
Cholesteryl acetate	2556	128585	50266.4	0.618197	2556	55867	16633.1	1.08081	2556	20087	4962.94	1.14731	0.0200966	0.7004
